# Supplementary material
Source: PubMed Central journal article supplement (PMC3514767)

**Supporting information to:**

**Regulation of HL-1 cardiomyocyte apoptosis by EphA2 receptor tyrosine kinase phosphorylation and protection by lithocholic acid**

J. Jehle, I. Staudacher, F. Wiedmann, P.A. Schweizer, R. Becker, H.A. Katus, D.

Thomas

Department of Cardiology, Medical University Hospital, Heidelberg, Im Neuenheimer  
Feld 410, D-69120 Heidelberg, Germany

## Supplementary Table

**Table S1** Overview: primary antibodies used in this study.

| Antibody (order number; manufacturer)    | Antigen, amino acid alignment, description (where available)                                                                                                                                                                                                                                                                                                                                                                                                                                                                 | Species specificity according to the manufacturer | References reporting antibody use in indicated murine tissue/cells                   |
|------------------------------------------|------------------------------------------------------------------------------------------------------------------------------------------------------------------------------------------------------------------------------------------------------------------------------------------------------------------------------------------------------------------------------------------------------------------------------------------------------------------------------------------------------------------------------|---------------------------------------------------|--------------------------------------------------------------------------------------|
| Caspase 3 (9665; Cell Signaling)         | Human:<br>DTIYPRNPAMYSEE <b>EARL</b> KSFQ <b>NP</b> <b>D</b><br>Mouse:<br>DTIYPRNPAM <b>C</b> SEE <b>EARL</b> KSFQ <b>NP</b> <b>D</b><br><br>Monoclonal antibody produced by immunizing rabbits with a synthetic peptide corresponding to amino-terminal residues adjacent to Asp175 (highlighted in yellow) in human caspase-3. Differences between human and murine sequences are marked in red.                                                                                                                           | Human, mouse, rat, monkey                         | Wright <i>et al.</i> , 2004 (fibroblasts);<br>Wright <i>et al.</i> , 2007 (neurones) |
| Cleaved caspase 3 (9661; Cell Signaling) | Human:<br>DTIYPRNPAMYSEE <b>EARL</b> KSFQ <b>NP</b> <b>D</b><br>Mouse:<br>DTIYPRNPAM <b>C</b> SEE <b>EARL</b> KSFQ <b>NP</b> <b>D</b><br><br>Polyclonal antibodies produced by immunizing rabbits with a synthetic peptide corresponding to amino-terminal residues adjacent to Asp175 (highlighted in yellow) in human caspase-3. This antibody does not recognize full length caspase-3 or other cleaved caspases. Differences between human and murine sequences are marked in red.                                       | Human, mouse, rat, monkey                         | Garnier <i>et al.</i> , 2003 (neurones)                                              |
| EphA2 (sc-924; Santa Cruz)               | Rabbit polyclonal antibody against an epitope mapping at the C-terminus of murine EphA2 (no specific information provided).                                                                                                                                                                                                                                                                                                                                                                                                  | Mouse, rat, human, mink                           | Xu <i>et al.</i> , 2005 (kidney)                                                     |
| FAK (ab40794; Abcam)                     | Human:<br>TILEEEKAQQEERM <b>RM</b> ESRRQATVSWDSGG <b>S</b><br>DEAPPKPSRPGYSPRSSEG (corresponding to amino acid positions 700-750)<br>Mouse:<br>TILEEEK <b>V</b> QQEERM <b>RM</b> ESRRQATVSWDSGG <b>S</b><br>DEAPPKPSRPGYSPRSSEG (corresponding to amino acid positions 628-678)<br><br>Rabbit monoclonal antibody produced in rabbits against a synthetic peptide corresponding to non-disclosed residues located within amino acids 700-750 in human FAK. Differences between human and murine sequences are marked in red. | Human, mouse, rat                                 | Ma <i>et al.</i> , 2010 (colonic epithelial cells)                                   |

|                                                                           |                                                                                                                                                                                                                                                                                                                                                                                                                                                                                                                                                                                                                                                                                                                                                                                                                                                                                                                                                                                        |                                                                     |                                                             |
|---------------------------------------------------------------------------|----------------------------------------------------------------------------------------------------------------------------------------------------------------------------------------------------------------------------------------------------------------------------------------------------------------------------------------------------------------------------------------------------------------------------------------------------------------------------------------------------------------------------------------------------------------------------------------------------------------------------------------------------------------------------------------------------------------------------------------------------------------------------------------------------------------------------------------------------------------------------------------------------------------------------------------------------------------------------------------|---------------------------------------------------------------------|-------------------------------------------------------------|
| GADD153<br>(ab11419;<br>Abcam)                                            | Mouse monoclonal to GADD153, directed against bacterially expressed mouse CHOP (GADD153) fusion protein.                                                                                                                                                                                                                                                                                                                                                                                                                                                                                                                                                                                                                                                                                                                                                                                                                                                                               | Mouse, Rat,<br>Human                                                | Nishina <i>et al.</i> ,<br>2010 (liver)                     |
| GAPDH<br>(G8140-<br>11(A); US-<br>Biological)                             | Human:<br>STHGKFGHTVKAENGLVINGNPITIFQERDPSKIKWGDAGAEYVVESTG<br>VFTTMEKAGAHLLQGGAKRVIISAPSADAPMFVMGVNHEKYDNSLKIISNA<br>SCTTNCLAPLAKVIHDFGIVEGLMTTVHAITATQKTVDGPSGKLWRDGR<br>GALQNIIPASTGAAKAVGKVIPELNGKLTGMAFRVPTANVSVVDLTCRLE<br>KPAKYDDIKKVVVKQASEGPLKILGYTEHQVVSDFNSDT (corresponding<br>to amino acid positions 51-290)<br>Mouse:<br>STHGKFN <del>GT</del> VKAENGLVINGK <del>P</del> ITIFQERDP <del>T</del> NIKWGEAGAAYVVESTG<br>VFTTMEKAGAHLL <del>K</del> GGAKRVIISAPSADAPMFVMGVNHEKYDNSLKI <del>V</del> SNA<br>SCTTNCLAPLAKVIHDFGIVEGLMTTVHAITATQKTVDGPSGKLWRDGR<br>GAA <del>Q</del> NIIPASTGAAKAVGKVIPELNGKLTGMAFRVPT <del>P</del> NVSVVDLTCRLE<br>KPAKYDDIKKVVVKQASEGPLKILGYTE <del>D</del> QVVS <del>C</del> DFNS <del>N</del> S (corresponding<br>to amino acid positions 49-298)<br><br>Mouse monoclonal antibody. Immunogen: synthetic peptide corresponding to<br>amino acids 51-290 of human GAPDH. Differences between human and<br>murine sequences are marked in red. | Human,<br>mouse, rat                                                | Lugenbiel <i>et al.</i> , 2012 (HL-1<br>cells)              |
| Phospho-Akt<br>(Ser473)<br>(9271; Cell<br>Signaling)                      | Polyclonal antibodies produced by immunizing rabbits with a synthetic phosphopeptide corresponding to residues surrounding Ser473 of mouse Akt.                                                                                                                                                                                                                                                                                                                                                                                                                                                                                                                                                                                                                                                                                                                                                                                                                                        | Mouse,<br>human, rat,<br>hamster, fruit<br>fly, bovine,<br>dog, pig | Paling <i>et al.</i> ,<br>2004<br>(embryonic<br>stem cells) |
| Phospho-<br>EphA2<br>(Tyr594)<br>(CB4368;<br>Cell<br>Applications)        | Human:<br>VYFSKSEQLKPLKTYVDPHT <del>Y</del> EDPNQAVLKFTEIHPSCVT<br>Mouse:<br>V <del>R</del> FSKSEQLKPLKTYVDPHT <del>Y</del> EDPNQAVLKFTEIHPSCVA<br><br>Polyclonal antibodies produced in rabbit. Antigen: KLH-conjugated peptide<br>containing human EphA2 Tyr594 (highlighted in yellow) and surrounding<br>sequence. Differences between human and murine sequences are marked<br>in red.                                                                                                                                                                                                                                                                                                                                                                                                                                                                                                                                                                                            | Human,<br>mouse, rat                                                |                                                             |
| Phospho-<br>p38 MAPK<br>(Thr180 /<br>Tyr182)<br>(9211; Cell<br>Signaling) | Human:<br>LKPSNLAVNEDCELKILDFGLARHTDDEM <del>T</del> GY <del>V</del> ATRWRAP <del>E</del> IMLNWMHY<br>NQTVDIWSVGCIMAELLTGRTLFPGTDHINQLQQIMRLTGTPPAYLINRM<br>Mouse:<br>LKPSNLAVNEDCELKILDFGLARHTDDEM <del>T</del> GY <del>V</del> ATRWRAP <del>E</del> IMLNWMHY<br>NQTVDIWSVGCIMAELLTGRTLFPGTDHINQLQQIMRLTGTPPAYLINRM<br><br>Polyclonal antibodies produced by immunizing rabbits with a synthetic<br>phosphopeptide corresponding to residues around Thr180/Tyr182<br>(highlighted in yellow) of human p38 MAPK.                                                                                                                                                                                                                                                                                                                                                                                                                                                                       | Human,<br>mouse, rat,<br>monkey, fruit<br>fly, pig                  | Kawagoe <i>et al.</i> ,<br>2008<br>(macrophages)            |

|                                               |                                                                                                                                                                                                                                                                                                                                                                                                                                                                                                                                                                                                                                                                                                                                                                                                                                                               |                   |                                           |
|-----------------------------------------------|---------------------------------------------------------------------------------------------------------------------------------------------------------------------------------------------------------------------------------------------------------------------------------------------------------------------------------------------------------------------------------------------------------------------------------------------------------------------------------------------------------------------------------------------------------------------------------------------------------------------------------------------------------------------------------------------------------------------------------------------------------------------------------------------------------------------------------------------------------------|-------------------|-------------------------------------------|
| Phospho-SHP-2 (Tyr542) (3751; Cell Signaling) | Human:<br>IETLQRRIEEEQKSKRKGHE <sup>Y</sup> TNLIKYSLADQTSGDQSPLPP<br>Mouse:<br>IETLQRRIEEEQKSKRKGHE <sup>Y</sup> TNLIKYS <sup>L</sup> V <sup>D</sup> QTSGDQSPLPP<br><br>Polyclonal antibodies produced by immunizing rabbits with a synthetic phosphopeptide corresponding to residues surrounding Tyr542 (highlighted in yellow) of human SHP-2 protein. Differences between human and murine sequences are marked in red.                                                                                                                                                                                                                                                                                                                                                                                                                                   | Human, mouse, rat | Pan <i>et al.</i> , 2008 (lacrimal gland) |
| SHP-2 (3752; Cell Signaling)                  | Human:<br>MTSRRWFHPNITGVEAENLLLTRGVDGSFLARPSKSNPGDFTLSVRRNGA<br>VTHIKIQTGDYYDLYGGEKFATLAELVQYYMEHHGQLKEKNGDVIELKY<br>PLNCADPTSERWFHGHLSGKEAEKLLTEKGKHGSFLVRESQSHPGDFVLS<br>VRTGDDKGESNDGKSKVTHVMIRCQELKYDVGGGERFDSLTDLVEHYKKN<br>PMVETLGTVLQLKQPLNTRINAAEIESRVRELSKLAETTDKVKQGFWEE<br>(corresponding to amino acid positions 1-250)<br>Mouse:<br>MTSRRWFHPNITGVEAENLLLTRGVDGSFLARPSKSNPGDFTLSVRRNGA<br>VTHIKIQTGDYYDLYGGEKFATLAELVQYYMEHHGQLKEKNGDVIELKY<br>PLNCADPTSERWFHGHLSGKEAEKLLTEKGKHGSFLVRESQSHPGDFVLS<br>VRTGDDKGESNDGKSKVTHVMIRCQELKYDVGGGERFDSLTDLVEHYKKN<br>PMVETLGTVLQLKQPLNTRINAAEIESRVRELSKLAETTDKVKQGFWEE<br>(corresponding to amino acid positions 1-250)<br><br>Polyclonal antibodies produced by immunizing rabbits with a synthetic peptide corresponding to non-disclosed residues surrounding the amino-terminal domain of human SHP-2. | Human, mouse, rat |                                           |

Akt, protein kinase B; EphA2, erythropoietin-producing human hepatocellular carcinoma receptor tyrosine kinase A2; FAK, focal adhesion kinase; GADD153, growth arrest and DNA damage inducible gene 153; GAPDH, glyceraldehyde-3-phosphate dehydrogenase; MAPK, mitogen-activated protein kinase; SHP-2, Src homology domain-containing protein tyrosine phosphatase 2

## Supplementary References

Garnier P, Ying W, Swanson RA (2003). Ischemic preconditioning by caspase cleavage of poly(ADP-ribose) polymerase-1. *J Neurosci* **23**: 7967-7973.

Kawagoe T, Sato S, Matsushita K, Kato H, Matsui K, Kumagai Y, et al. (2008). Sequential control of Toll-like receptor-dependent responses by IRAK1 and IRAK2. *Nat Immunol* **9**: 684-691.

Lugenbiel P, Bauer A, Kelemen K, Schweizer PA, Becker R, Katus HA, et al. (2012). Biological heart rate reduction through genetic suppression of Gas protein in the sinoatrial node. *J Am Heart Assoc* **1**: jah3-e000372.

Ma Y, Semba S, Maemoto A, Takeuchi M, Kameshita I, Ishida A, et al. (2010). Oxazolone-induced over-expression of focal adhesion kinase in colonic epithelial cells of colitis mouse model. *FEBS Lett* **584**: 3949-3954.

Nishina S, Korenaga M, Hidaka I, Shinozaki A, Sakai A, Gondo T, et al. (2010). Hepatitis C virus protein and iron overload induce hepatic steatosis through the unfolded protein response in mice. *Liver Int* **30**: 683-692.

Paling NR, Wheadon H, Bone HK, Welham MJ (2004). Regulation of embryonic stem cell self-renewal by phosphoinositide 3-kinase-dependent signaling. *J Biol Chem* **279**: 48063-48070.

Pan Y, Carbe C, Powers A, Zhang EE, Esko JD, Grobe K et al. (2008). Bud specific N-sulfation of heparan sulfate regulates Shp2-dependent FGF signaling during lacrimal gland induction. *Development* **135**: 301-310.

Wright KM, Linhoff MW, Potts PR, Deshmukh M (2004). Decreased apoptosome activity with neuronal differentiation sets the threshold for strict IAP regulation of apoptosis. *J Cell Biol* **167**: 303-313.

Wright KM, Vaughn AE, Deshmukh M (2007). Apoptosome dependent caspase-3 activation pathway is non-redundant and necessary for apoptosis in sympathetic neurons. *Cell Death Differ* **14**: 625-633.

Xu H, Tian W, Lindsley JN, Oyama TT, Capasso JM, Rivard CJ, et al. (2005). EphA2: expression in the renal medulla and regulation by hypertonicity and urea stress in vitro and in vivo. *Am J Physiol Renal Physiol* **288**: F855-F866.

## Supplementary Figure legend

**Figure S1** Original Western blots corresponding to protein analysis displayed in Figure 2. Apoptosis was associated with increased activation/phosphorylation of erythropoietin-producing human hepatocellular carcinoma receptor tyrosine kinase A2 (EphA2; B), Src homology domain-containing protein tyrosine phosphatase 2 (SHP-2; D), and p38 mitogen-activated protein kinase (MAPK; F), while total EphA2 (A) and SHP-2 (C) levels were not significantly affected. Focal adhesion kinase (FAK) exhibited reduced expression owing to cleavage (E), and growth arrest and DNA damage inducible gene 153 (GADD153) protein levels were elevated (G). The anti-apoptotic protein kinase B (p-Akt) was suppressed (H). (I, J) Doxazosin treatment induced cleavage of caspase 3 (I) associated with decreased expression of pre-processed caspase 3 levels (J).

# Figure S1

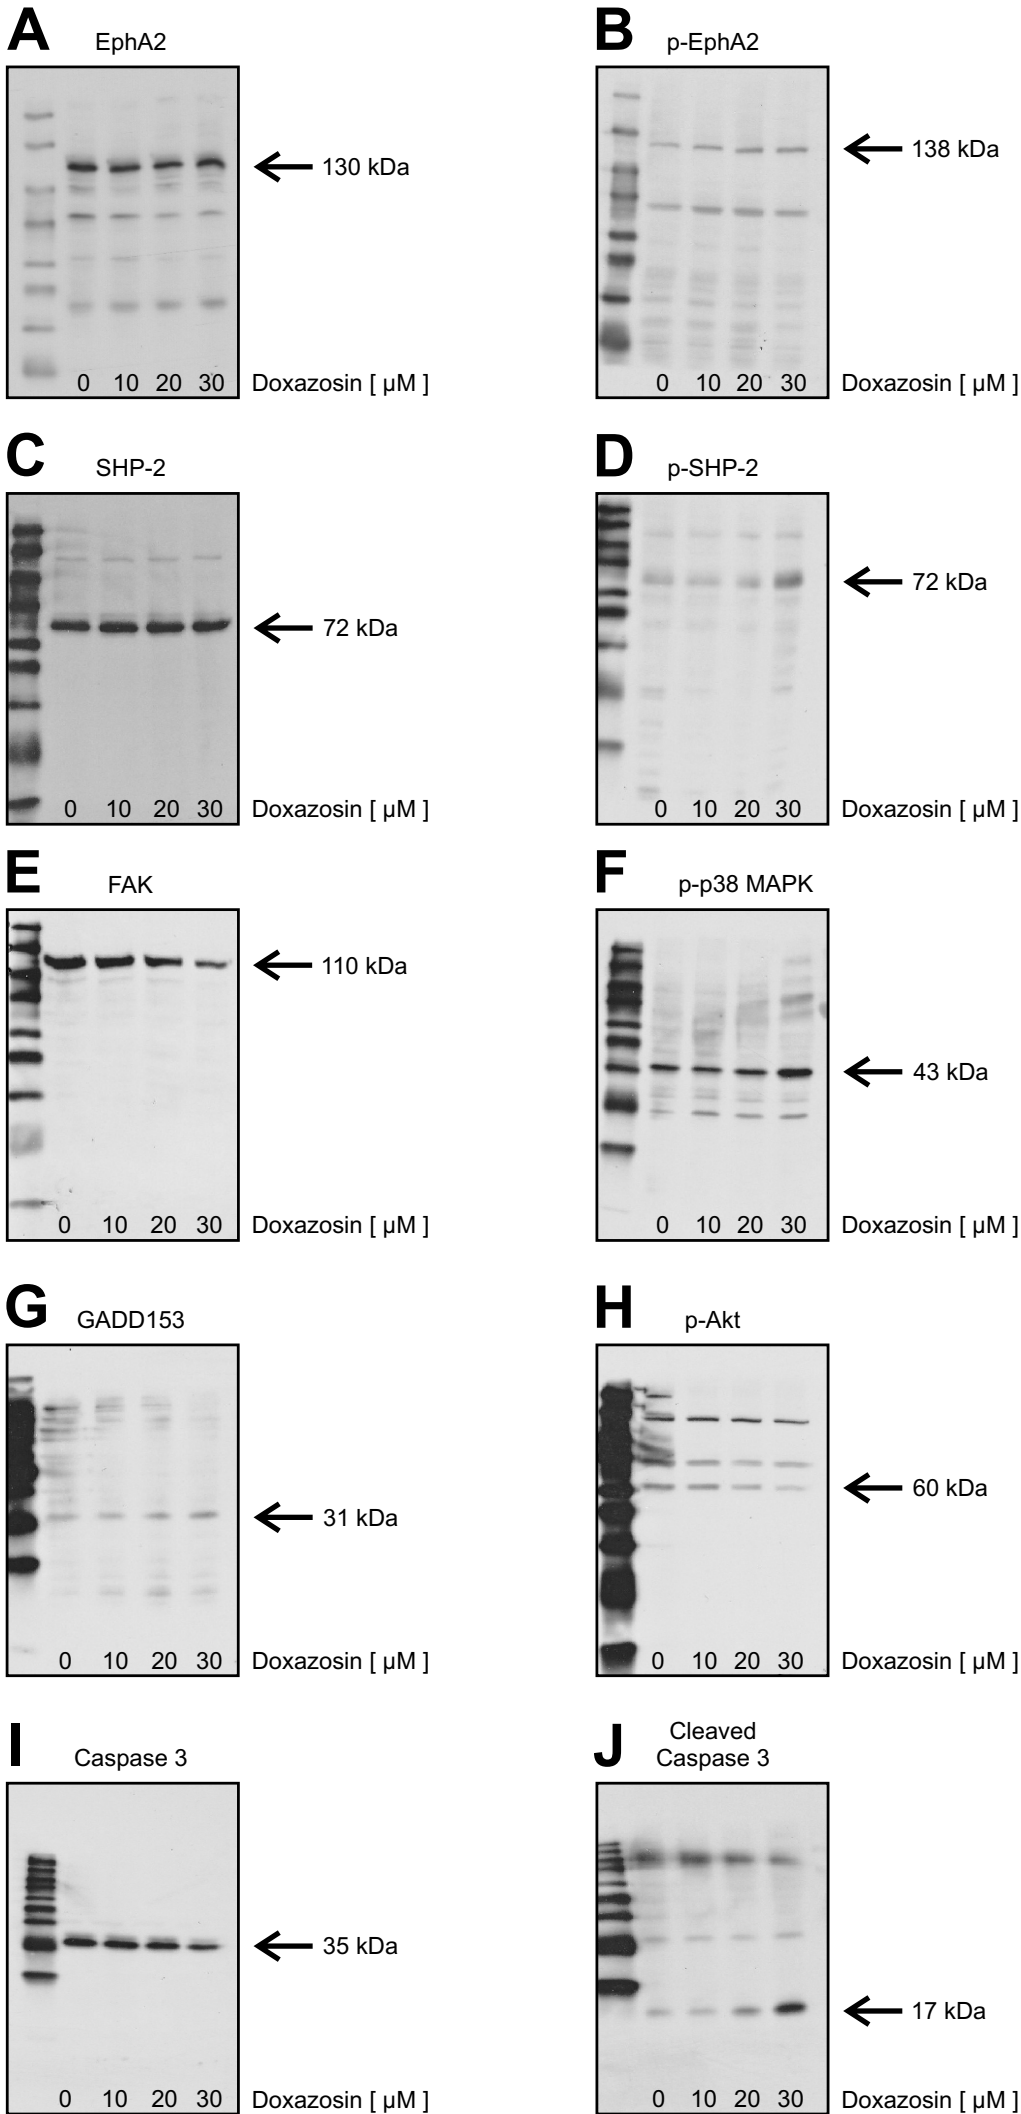

Supplement: bph0167-1563-SD1.pdf [file bph0167-1563-SD1.pdf]
